# Supplementary material for: Analysis of the levels of lysine-specific demethylase 1 (LSD1) mRNA in human ovarian tumors and the effects of chemical LSD1 inhibitors in ovarian cancer cell lines
Source: PubMed Central journal article supplement (PMC4176291; doi:10.1186/1757-2215-6-75), 2013-10-29
Supplement: 1757-2215-6-75-S1.pdf [file 1757-2215-6-75-S1.pdf]

**Clinicopathologic parameters of the study cohort (n=177)**

**Gender:** female

**Age:** 23–91 years (mean=57.67)

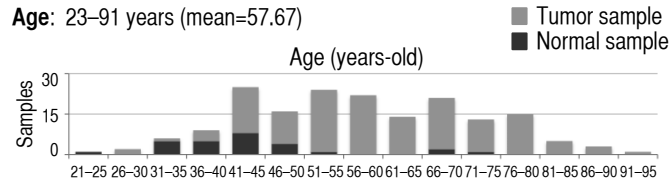

**Tissue origin:**

Ovary n=177

**Sample tissue source:**

Normal ovary n=27  
Tumor, ovary n=128  
Tumor, metastatic site\* n=22

**Diagnosis**

|                       |                       |
|-----------------------|-----------------------|
| Adenocarcinoma n=123  | Carcinoma n=17        |
| Serous n=38           | Papillary serous n=8  |
| Papillary serous n=39 | Endometrioid n=6      |
| Endometrioid n=29     | Clear cell n=1        |
| Clear cell n=7        | Other n=2             |
| Mucinous n=5          | Carcinosarcoma n=1    |
| Other n=5             | Tumor, borderline n=9 |

**FIGO stage classification:**

Stage 0 (normal) n=27  
Stage IA n=19  
Stage IB n=9  
Stage IC n=11  
Stage II, unc. n=1  
Stage IIA n=2  
Stage IIB n=9  
Stage IIC n=3  
Stage III, unc. n=7

Stage IIIA n=13  
Stage IIIB n=22  
Stage IIIC n=44  
Stage IV n=10

**FIGO tumor grade classification:**

Borderline malignancy n=7  
G1 n=12  
G2 n=41  
G3 n=74  
Not Reported n=16

\* Omentum, peritoneum, lymph node, pelvic wall, liver, or colon.
