# Supplementary material for: Analysis of the levels of lysine-specific demethylase 1 (LSD1) mRNA in human ovarian tumors and the effects of chemical LSD1 inhibitors in ovarian cancer cell lines
Source: PubMed Central journal article supplement (PMC4176291; doi:10.1186/1757-2215-6-75), 2013-10-29

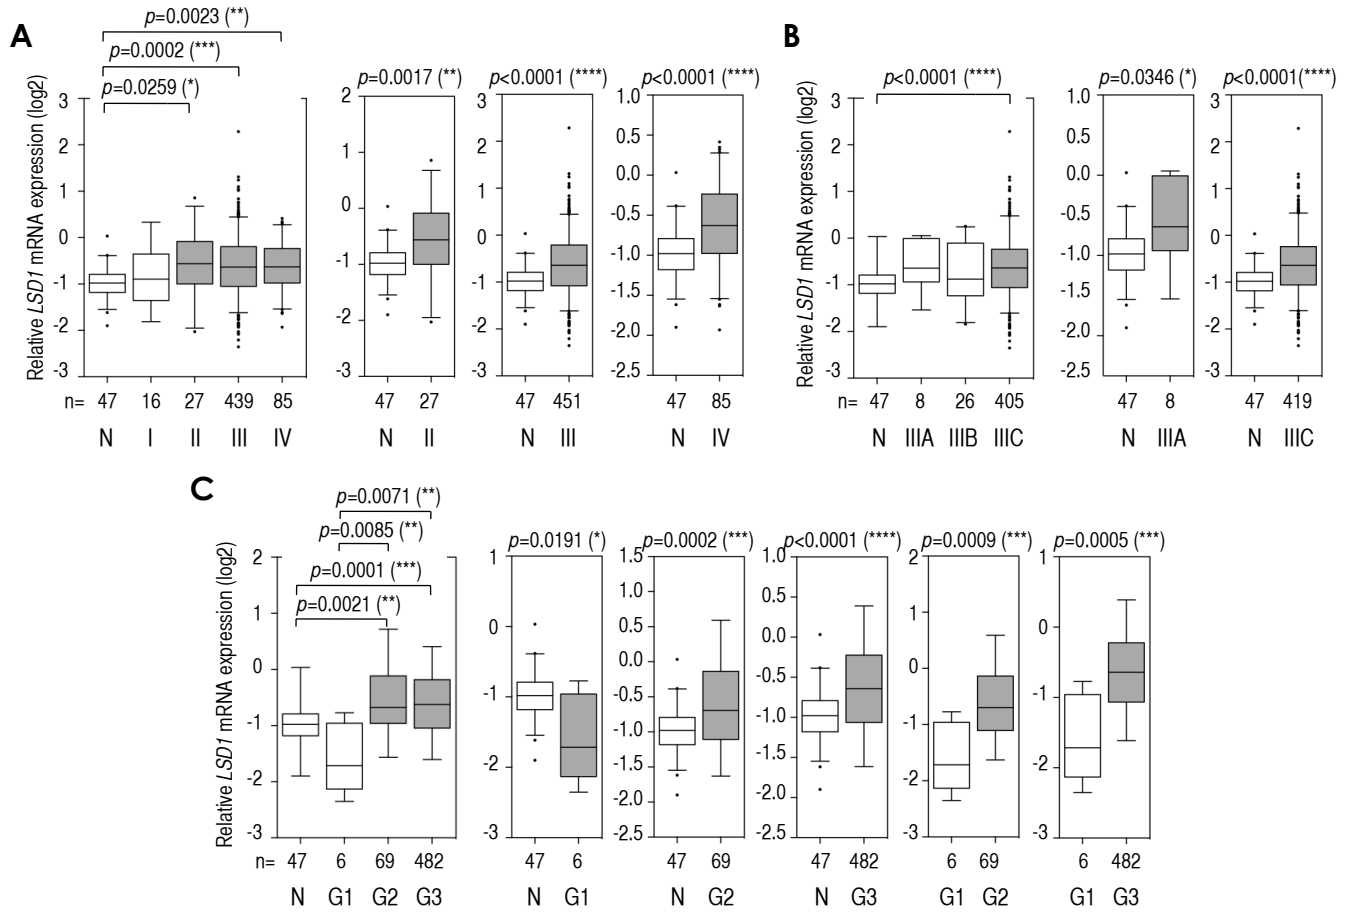

Supplement: 1757-2215-6-75-S4.pdf [file 1757-2215-6-75-S4.pdf]
