# Supplementary material for: Analysis of the levels of lysine-specific demethylase 1 (LSD1) mRNA in human ovarian tumors and the effects of chemical LSD1 inhibitors in ovarian cancer cell lines
Source: PubMed Central journal article supplement (PMC4176291; doi:10.1186/1757-2215-6-75), 2013-10-29

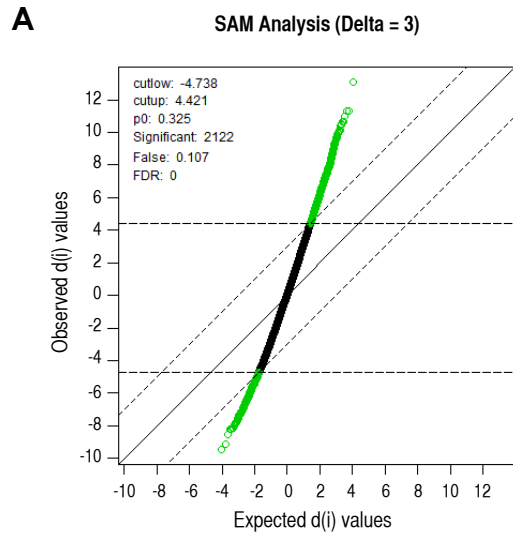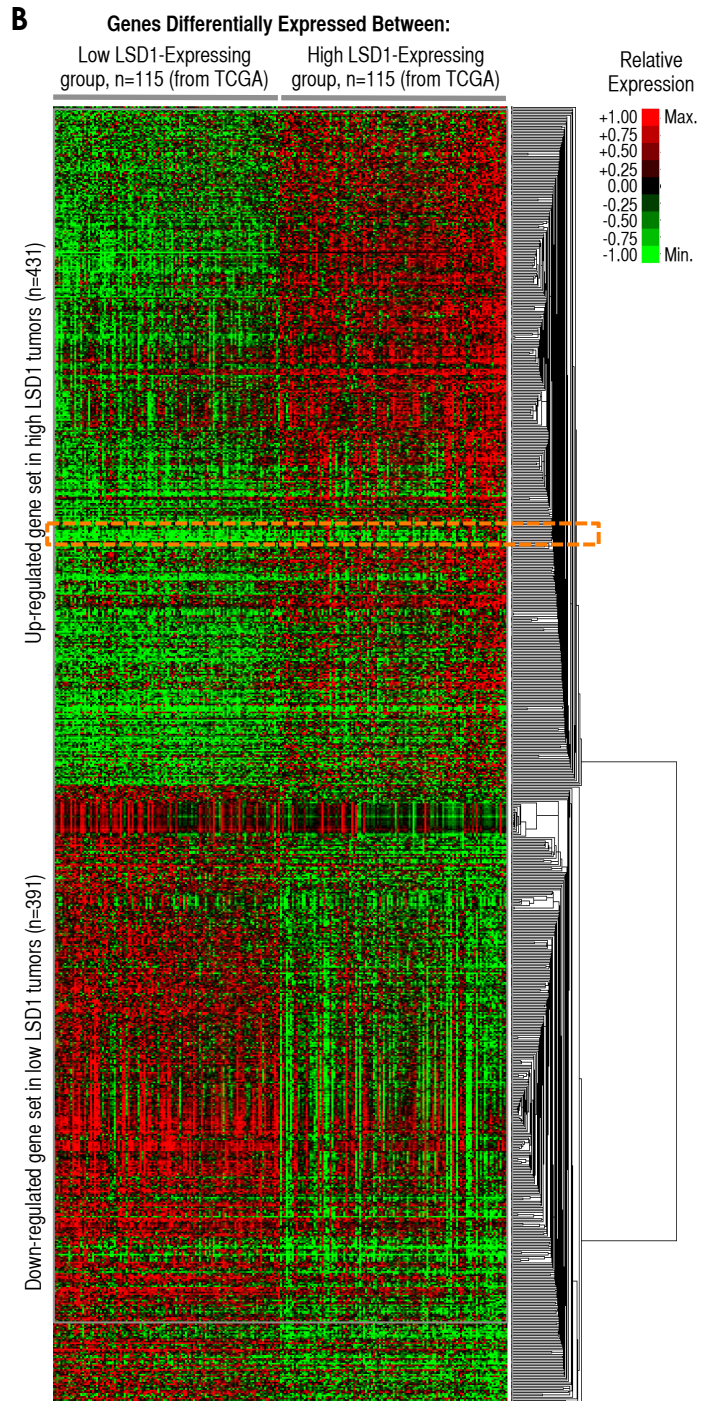

**C Genes showing expression correlation with *LSD1* in:**

| Percentage of specimens | Positively correlating | Negatively correlating | Total |
|-------------------------|------------------------|------------------------|-------|
| >80%                    | 4                      | 0                      | 4     |
| >70%                    | 35                     | 2                      | 37    |
| >50%                    | 243                    | 215                    | 458   |
| >30%                    | 382                    | 346                    | 728   |
| <30%                    | 430                    | 391                    | 821   |

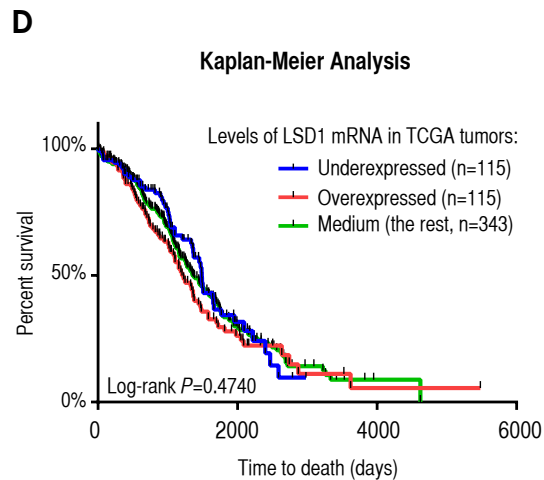

Supplement: 1757-2215-6-75-S6.pdf [file 1757-2215-6-75-S6.pdf]
