# Supplementary material for: Analysis of the levels of lysine-specific demethylase 1 (LSD1) mRNA in human ovarian tumors and the effects of chemical LSD1 inhibitors in ovarian cancer cell lines
Source: PubMed Central journal article supplement (PMC4176291; doi:10.1186/1757-2215-6-75), 2013-10-29
Supplement: 1757-2215-6-75-S7.pdf [file 1757-2215-6-75-S7.pdf]

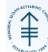

Gene Set / Pathway is altered in 5.2% of all cases.

Ovarian Serous Cystadenocarcinoma (TCGA, Provisional) / All Tumors: (580) / User-defined List / 1 gene

### OncoPrint

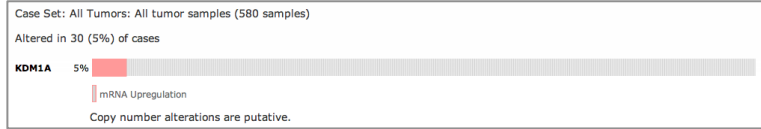

### Overall Survival

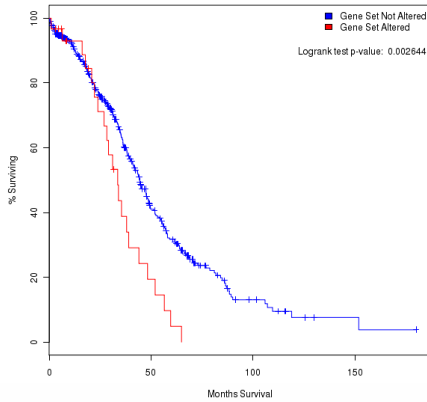

### Disease Free Survival

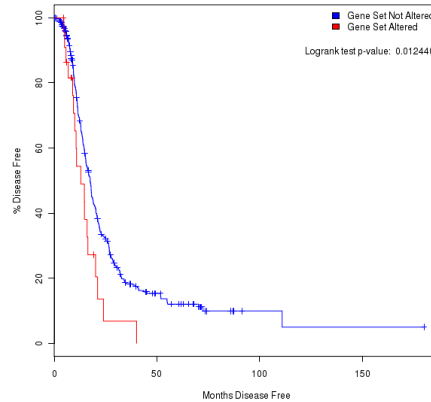

### Protein Levels (top) and Phosphorylation (bottom) Changes

| Antibody Type: | Protein     | Target      | Residue | Ave. Abundance |         | p-value | Plot |
|----------------|-------------|-------------|---------|----------------|---------|---------|------|
|                |             |             |         | Unaltered      | Altered |         |      |
| protein_level  | TGM2        |             |         | 0.03           | -0.48   | 1.48e-6 |      |
|                | CASP7       |             |         | 0.04           | -0.39   | 4.59e-6 |      |
|                | MSH2        | cleavedD198 |         | -0.07          | 1.01    | 4.81e-6 |      |
|                | LCK         |             |         | 0.06           | -0.90   | 1.48e-5 |      |
|                | MSH6        |             |         | -0.07          | 1.06    | 1.79e-5 |      |
|                | PTCH1       |             |         | 0.04           | -0.71   | 4.08e-5 |      |
|                | EGFR        |             |         | 0.04           | -0.48   | 2.36e-4 |      |
|                | RBM3        |             |         | 0.06           | -0.79   | 2.64e-4 |      |
|                | CCNB1       |             |         | -0.05          | 0.69    | 2.70e-4 |      |
|                | ANKK1       |             |         | 0.06           | -0.80   | 4.66e-4 |      |
|                | INP4B       |             |         | 0.03           | -0.53   | 6.57e-4 |      |
|                | BAK         |             |         | 0.03           | -0.60   | 8.77e-4 |      |
|                | NF2         |             |         | 0.05           | -0.77   | 0.001   |      |
|                | IGFBP2      |             |         | -0.04          | 0.55    | 0.003   |      |
|                | PTGS2       |             |         | 0.04           | -0.44   | 0.004   |      |
|                | XIAP        |             |         | 0.03           | -0.49   | 0.004   |      |
|                | STMN1       |             |         | -0.02          | 0.49    | 0.005   |      |
|                | MAPK9       |             |         | 0.03           | -0.54   | 0.008   |      |
|                | BID         |             |         | 0.04           | -0.49   | 0.008   |      |
|                | CDK1        |             |         | -0.03          | 0.55    | 0.008   |      |
|                | XRCC1       |             |         | -0.05          | 0.86    | 0.009   |      |
|                | NCOA3       |             |         | -0.05          | 0.64    | 0.009   |      |
|                | VASP        |             |         | 0.04           | -0.52   | 0.009   |      |
|                | CHEK1       |             |         | -0.03          | 0.49    | 0.010   |      |
|                | RAB25       |             |         | 0.03           | -0.23   | 0.011   |      |
|                | BCL2L1      |             |         | 0.04           | -0.53   | 0.012   |      |
|                | IGF1R       |             |         | -0.03          | 0.49    | 0.013   |      |
|                | PIK1        |             |         | 0.03           | -0.30   | 0.014   |      |
|                | RAD51       |             |         | -0.03          | 0.40    | 0.015   |      |
|                | PRKCA       |             |         | 0.02           | -0.39   | 0.015   |      |
|                | CHEK2       |             |         | -0.03          | 0.35    | 0.016   |      |
|                | PTK2        |             |         | 0.03           | -0.44   | 0.017   |      |
|                | TP53        |             |         | -0.03          | 0.46    | 0.019   |      |
|                | NOTCH3      |             |         | -0.04          | 0.58    | 0.019   |      |
|                | TP53BP1     |             |         | -0.04          | 0.52    | 0.022   |      |
|                | GSK3A/GSK3B |             |         | -0.03          | 0.41    | 0.026   |      |
|                | BCL2L1      |             |         | 0.02           | -0.37   | 0.026   |      |
|                | CD49        |             |         | 0.03           | -0.41   | 0.026   |      |
|                | MAPK1       |             |         | 0.02           | -0.44   | 0.034   |      |
|                | GATA3       |             |         | 0.03           | -0.38   | 0.039   |      |
| GAB2           |             |             | 0.02    | -0.38          | 0.043   |         |      |
| BRCC1          |             |             | -0.02   | 0.28           | 0.045   |         |      |
| CDH1           |             |             | 0.03    | -0.53          | 0.048   |         |      |

  

| Antibody Type:  | Protein  | Target | Residue | Ave. Abundance |         | p-value | Plot |
|-----------------|----------|--------|---------|----------------|---------|---------|------|
|                 |          |        |         | Unaltered      | Altered |         |      |
| phosphorylation | WWTR1    | pS89   |         | -0.07          | 0.96    | 4.73e-5 |      |
|                 | FOXO3    | pS318  |         | 0.03           | -0.58   | 3.50e-4 |      |
|                 | ARAF     | pS299  |         | 0.04           | -0.58   | 3.75e-4 |      |
|                 | IRS1     | pS807  |         | -0.05          | 0.71    | 0.004   |      |
|                 | SHC1     | pY317  |         | 0.03           | -0.46   | 0.004   |      |
|                 | CHEK2    | pT68   |         | -0.02          | 0.45    | 0.013   |      |
|                 | JUN      | pS73   |         | -0.04          | 0.53    | 0.016   |      |
|                 | CHEK1    | pS345  |         | -0.02          | 0.39    | 0.022   |      |
|                 | EIF4EBP1 | pT170  |         | -0.03          | 0.50    | 0.037   |      |
|                 | RPS6KA1  | pT359  |         | -0.03          | 0.40    | 0.043   |      |
